# Supplementary material
Source: publisher figshare collection journal article supplement (https://acs.figshare.com/ndownloader/files/4491499)
Supplement: Supplementary file 1 [file 4491499]

1  
2  
3  
4  
5 **On-Line Supplementary Material**  
6  
7  
8

9 **Bioavailability of Green Tea Flavan-3-ols and the Role of the Colon**  
10  
11  
12

13 SURI ROOWI<sup>§</sup>, ANGELIQUE STALMACH<sup>§</sup>, WILLIAM MULLEN<sup>§</sup>, MICHAEL E.J. LEAN<sup>#</sup>, CHRISTINE  
14 A. EDWARDS<sup>#</sup> AND ALAN CROZIER<sup>§\*</sup>  
15

16 <sup>§</sup>Plant Products and Human Nutrition Group, Graham Kerr Building, Division of Ecology and  
17 Evolutionary Biology, Faculty of Biomedical and Life Sciences, University of Glasgow, Glasgow  
18 G12 8QQ, UK; <sup>\*</sup>Section of Human Nutrition, University of Glasgow, Faculty of Medicine, Queen  
19 Elizabeth Building, Royal Infirmary, Glasgow G31 2ER, UK; <sup>#</sup>Section of Human Nutrition,  
20 University of Glasgow Division of Developmental Medicine, Yorkhill Hospital, Glasgow G3 8SJ,  
21 UK.

As outlined in the main text, GC-MS of trimethylsilyl ethers was used to identify and quantify phenolic acids and related compounds in green tea, urine and fecal slurries. Identifications were based on co-chromatography with reference compounds, coupled with mass spectrometric fragmentation patterns and, when authentic standards were not available, by reference to published data and the NIST 98 MS library. A summary of the 16 compounds identified in this manner is presented in **Table S1**. It should be noted that 2- and 3-hydroxybenzoic acid, which were not detected in any of the samples analyzed, were separated by GC both from each other and from their 4-hydroxy isomer which, as noted in the main text, was detected in green tea and urine. These separations are in keeping with the GC analyses of Jenner *et al.* (2) who also reported the GC separation of the trimethylsilylated ether of 3- and 4-hydroxyphenylacetic acid. With regard to the identification of 3-(3-hydroxyphenyl)-3-hydroxypropionic acid, although standards of other 3-(hydroxyphenyl)-hydroxypropionic acid isomers were not available, the GC separation of the hydroxybenzoic acid isomers, and the hydroxyphenylacetic acids suggests that these compounds would also be resolved.

Typical GC-MS traces of urine collected 8-24 h after the ingestion of 300 mL of either green tea or water by a healthy subject and 300 mL of green tea a subject with an ileostomy are illustrated in **Figure S1**.

## LITERATURE CITED

- (1) Olthof, M. R.; Hollman, P. C. J.; Buijsman, M. N. C. P.; van Amelsvoort, J. M. M.; Katan, M. Chlorogenic acid, quercetin-3-rutinoside and black tea: phenols are extensively metabolized in humans. *J. Nutr.* **2003**, *133*, 1806-1814
- (2) Jenner, A. M.; Rafter, J.; Halliwell, B. Human fecal water content of phenolics, the extent of colonic exposure to aromatic compounds. *Free Rad. Biol. Med.* **2006**, *40*, 1035-1046.
- (3) Zadernowski, R.; Naczki, M.; Nesterwicz, J. Phenolic acid profiles in some small berries. *J. Agric. Food. Chem.* **2005**, *53*, 2118-2124.
- (4) Gonthier, M.-P.; Cheynier, V.; Donovan, J. L.; Manach, C.; Morand, C.; Mila, I.; Lapierre, C.; Rémésy, C.; Scalbert, A. Microbial aromatic acid metabolites formed in the gut

- 1 account for a major fraction of polyphenols excreted in urine of rats fed red wine
- 2 polyphenols. *J. Nutr.* **2003**, 133, 461-467.
- 3

**Table S1.** Retention Time and Characteristic Ions of Phenolic Acids and Catabolites in Green Tea, Urine and Fecal Slurries

| GC Peak | Phenolic acids and catabolites                             | $t_R$ (min) | Base ion ( $m/z$ ) | Qualifier ion ( $m/z$ ) | Identification                                              |
|---------|------------------------------------------------------------|-------------|--------------------|-------------------------|-------------------------------------------------------------|
| 1       | Pyrocatechol                                               | 12.62       | 254                | 239; 73                 | Standard, NIST                                              |
| 2       | Pyrogallol                                                 | 14.98       | 239                | 342; 73                 | Standard, NIST                                              |
| 3       | 4-Hydroxybenzoic acid                                      | 16.86       | 267                | 223; 193                | Standard, NIST, Olthof <i>et al.</i> (1)                    |
| 4       | 4-Hydroxyphenylacetic acid                                 | 17.02       | 296                | 281; 252                | Standard, NIST, Olthof <i>et al.</i> (1)                    |
| 5       | 3-(3-Hydroxyphenyl)propionic acid                          | 21.88       | 310                | 205; 192                | Standard                                                    |
| 6       | 3-Methoxy-4-hydroxyphenylacetic acid                       | 22.07       | 326                | 209; 179                | Standard, Olthof <i>et al.</i> (1) Jenner <i>et al.</i> (2) |
| 7       | 3-Hydroxycinnamic acid                                     | 23.00       | 308                | 293; 147                | Standard, Zadernowski <i>et al.</i> (3)                     |
| 8       | 3,4-Dihydroxybenzoic acid                                  | 24.52       | 193                | 165; 223                | Standard, NIST, Olthof <i>et al.</i> (1)                    |
| 1       | Hippuric acid                                              | 25.25       | 105                | 206; 236                | Standard, NIST, Olthof <i>et al.</i> (1)                    |
| 10      | 3-(3-Hydroxyphenyl)-3-hydroxypropionic acid                | 25.88       | 267                | 207; 147                | NIST                                                        |
| 11      | 4-Coumaric acid                                            | 28.70       | 308                | 293; 219                | Standard, NIST                                              |
| 12      | Gallic acid                                                | 29.96       | 458                | 281; 443                | Standard, NIST                                              |
| 13      | Ferulic acid                                               | 33.18       | 338                | 249; 323                | Standard, NIST                                              |
| 14      | 5-(3,4-Dihydroxyphenyl)- $\gamma$ -valeric acid            | 33.90       | 267                | 426; 205                | NIST                                                        |
| 15      | (-)-5-(3',4'-Dihydroxyphenyl)- $\gamma$ -valerolactone     | 34.44       | 352                | 267; 73                 | Gonthier <i>et al.</i> (4)                                  |
| 16      | (-)-5-(3',4',5'-Trihydroxyphenyl)- $\gamma$ -valerolactone | 34.95       | 352                | 268; 73                 | NIST                                                        |

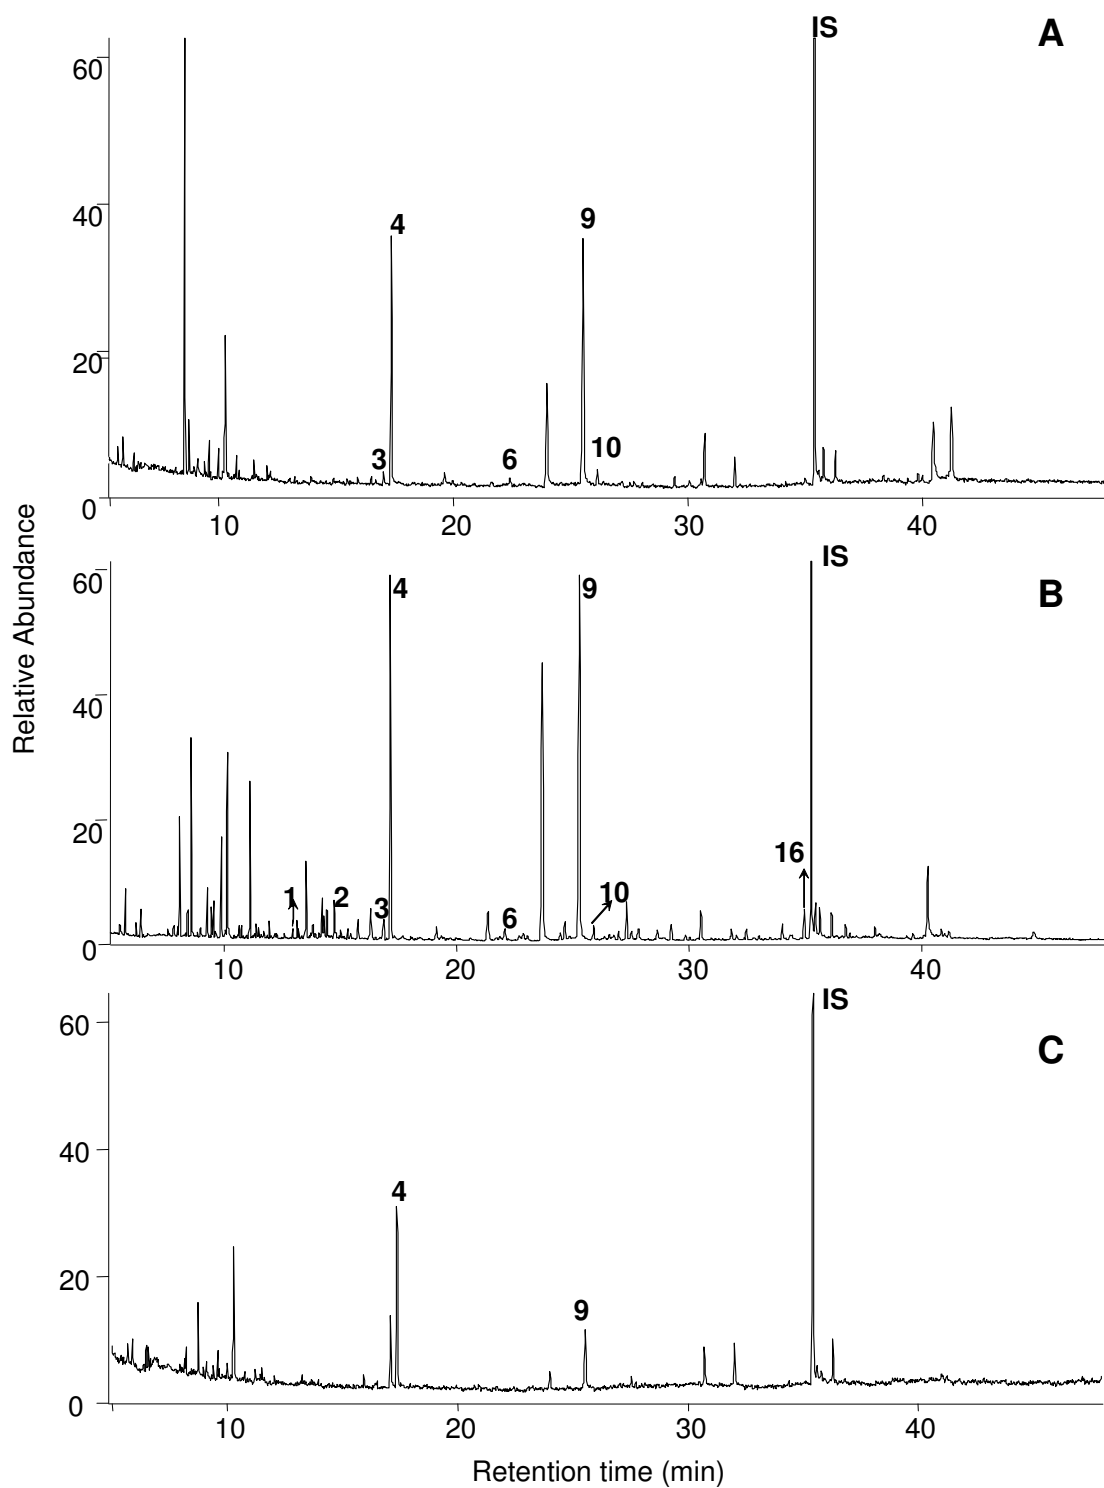

**Figure S1.** GC-MS traces of human urine collected 8-24 h after supplementation. (A) a healthy subject after drinking water, (B) a healthy subject after drinking green tea and, (C) an ileostomy volunteer after drinking green tea. For peak numbers, see **Table S1**. IS - internal standard
